# Supplementary material for: Suppression of STING Associated with LKB1 Loss in KRAS-Driven Lung Cancer
Source: Oxford University Press journal article supplement (doi:10.1158/2159-8290.cd-18-0689), 2018-10-08
Supplement: 203734_2_supp_5064039_pfsn6y.xlsx [file 203734_2_supp_5064039_pfsn6y.xlsx]

## Sheet: Down-regulated in KL
TCGA	CCLE	Merged
A1BG	AHNAK	AIM1
A2ML1	AIM1	AIM2
AACSL	AIM2	ALDH1A3
ABCB9	ALDH1A3	ANO1
ABHD5	ALPP	APOBEC3C
ABI3	ANO1	APOBEC3G
ABTB2	APOBEC3C	ARHGAP29
ACAP2	APOBEC3G	CAMK2N1
ACSBG2	APOL6	CCDC85B
ACSL6	ARHGAP29	CDC42EP3
ACTB	ATP2B4	CDH3
ACTBL2	CAB39	CLDN9
ADAM19	CAMK2N1	CMTM7
ADAM8	CAPN1	COL6A1
ADAMTSL1	CCDC85B	CRABP2
ADAMTSL5	CDC42EP3	CST6
ADAP2	CDH3	CYTH3
ADD3	CDKN2D	DHRS2
ADIPOQ	CHI3L1	DNTTIP1
ADORA1	CHPF	DPP4
ADORA3	CLDN6	DUSP10
ADRA2B	CLDN9	FABP4
AFAP1L2	CMTM7	FAM3C
AHR	COL1A1	FBXO32
AIF1	COL6A1	FILIP1L
AIF1L	CPLX1	FN1
AIFM3	CRABP2	FOSL1
AIM1	CRCT1	FRMD5
AIM2	CST6	GMFG
AK3L1	CTF1	GNA12
AKAP3	CXCL17	GPR87
AKAP5	CYTH3	HLA-G
ALDH1A3	DHRS2	HOMER3
ALDH1B1	DNAJA4	IFIT1
ALDOC	DNTTIP1	IFIT2
ALKBH8	DPP4	IFIT3
ALOX5	DUSP10	IGFBP6
ALOX5AP	EFEMP2	ITGA6
ALS2CR4	ERP27	IVL
AMFR	EVA1A	KCNN4
AMIGO2	FABP4	KCTD5
AMOT	FAM3C	KLK5
AMOTL2	FBLN2	LCP1
AMY1A	FBP1	LIMK1
AMY2A	FBXO32	LY6K
ANGPTL2	FILIP1L	MAML2
ANKRD13A	FN1	MAPKAPK3
ANKRD22	FOSL1	MBOAT2
ANKRD24	FRMD5	MEX3D
ANKRD58	FZD7	MUC21
ANKS1B	GALNT12	MYD88
ANLN	GCNT1	NEFH
ANO1	GMFG	NMNAT2
ANO4	GNA12	PLAU
ANO6	GNG2	PPARG
ANPEP	GPR87	RARRES3
ANTXR2	HIPK2	REN
ANXA1	HLA-G	RNF212
ANXA8	HOMER3	S100A2
ANXA8L2	HPCAL1	SDC4
AP1S2	IFIT1	SH3RF2
AP2M1	IFIT2	SHISA3
APC2	IFIT3	SLC2A12
APCDD1	IFITM10	SLC37A2
APCDD1L	IGFBP6	SLCO3A1
APLP1	IL13RA2	SPATS2L
APLP2	IL7R	SPRR1B
APOA4	INPP4B	SRPX
APOB48R	INSIG2	SRPX2
APOBEC2	ITGA4	STAG3
APOBEC3A	ITGA6	STK11
APOBEC3B	IVL	STK39
APOBEC3C	KCNN4	SYCP2
APOBEC3F	KCTD5	TMEM158
APOBEC3G	KISS1	TSPAN5
APOC1	KLK5	TTYH3
APOC2	KLK6	UBA6
APP	LAMA4	VCAM1
AQP1	LCP1	VGLL1
AREG	LIMK1	WLS
ARF4	LOC100505984	ZFP36L1
ARHGAP18	LOC554223	ZNF93
ARHGAP20	LOXL4
ARHGAP29	LRRN1
ARHGEF10L	LTBP2
ARHGEF6	LTBP3
ARID5A	LY6K
ARL11	LYPD6B
ARL13B	MAML2
ARL14	MAN1A1
ARL4A	MAPKAPK3
ARL6IP5	MBOAT2
ARL6IP6	MEX3D
ARNTL2	MMP9
ARPC1B	MUC21
ARPC2	MXRA8
ARRDC4	MYD88
ARSI	MYO6
ARX	NAPSA
ASAM	NEFH
ASB5	NEK6
ASPH	NMNAT2
ASPHD1	NPC2
ASTN1	OAT
ASZ1	OS9
ATG3	PCDHGB2
ATG9B	PCSK1N
ATP10A	PDP1
ATP10D	PLAU
ATP11B	PLEKHA7
ATP13A4	PPARG
ATP13A5	PPP3CA
ATP1A3	PRPS2
ATP1B3	QSOX1
ATP2C1	RALGPS2
ATP8B3	RAPH1
ATP8B4	RARRES3
AXL	RASA1
AZGP1	RBPJ
B3GALNT1	REN
B3GAT1	RGS14
B3GNT7	RNASE1
BACE1	RNF212
BACH1	S100A2
BAMBI	SAP25
BATF2	SCG2
BATF3	SDC4
BBOX1	SEC14L1
BBS9	SERPINA1
BCAP29	SERPINF1
BCAT1	SH3RF2
BCL10	SHISA3
BCL2A1	SLC17A9
BCL2L1	SLC20A1
BEAN	SLC2A12
BEND6	SLC37A2
BET1	SLC39A4
BHLHE41	SLC9A7
BICC1	SLCO3A1
BICD1	SNX30
BID	SOD3
BIRC2	SOX9
BIRC3	SPATS2L
BMP4	SPRR1B
BNC1	SRPX
BNC2	SRPX2
BNIP2	STAG3
BPGM	STK11
BRIP1	STK39
BST2	STS
BTG3	SYCP2
BTK	TELO2
BTN3A1	TMC5
BTN3A2	TMEM158
BTN3A3	TSPAN5
C10orf125	TTYH3
C10orf54	UBA6
C10orf55	UBE2E3
C10orf90	VCAM1
C11orf41	VGF
C11orf45	VGLL1
C11orf85	VSTM2L
C11orf86	WLS
C12orf39	ZFP36L1
C12orf49	ZMYND8
C12orf59	ZNF608
C13orf35	ZNF702P
C14orf34	ZNF93
C15orf48
C16orf5
C16orf72
C16orf73
C17orf104
C17orf60
C17orf67
C17orf87
C18orf18
C18orf2
C19orf38
C19orf57
C19orf59
C1GALT1
C1orf126
C1orf162
C1orf174
C1orf54
C1orf59
C1orf65
C1QA
C1QB
C1QC
C1QL1
C21orf67
C21orf91
C2CD4C
C2orf89
C3AR1
C3orf37
C3orf55
C3orf57
C3orf59
C3orf72
C5orf55
C5orf62
C6orf105
C6orf120
C6orf123
C6orf124
C6orf141
C6orf15
C6orf174
C6orf222
C6orf223
C6orf58
C7orf10
C7orf52
C7orf58
C7orf60
C7orf70
C9orf109
C9orf110
C9orf84
CA10
CACHD1
CACNG4
CADM2
CADPS
CALB2
CALCR
CALHM2
CALML5
CALU
CAMK1
CAMK2N1
CAMK2N2
CAPZA1
CAPZA2
CAPZB
CARD16
CARD9
CARHSP1
CASP1
CASP10
CASP4
CASP8
CATSPER1
CBL
CBX6
CCBE1
CCDC109B
CCDC155
CCDC80
CCDC85B
CCDC88A
CCDC90B
CCIN
CCL11
CCL2
CCL28
CCL3
CCL4
CCL4L2
CCL7
CCL8
CCM2
CCND1
CCNF
CCR1
CCR5
CD101
CD109
CD14
CD1A
CD1E
CD207
CD274
CD300A
CD300C
CD300LF
CD33
CD4
CD40
CD44
CD47
CD52
CD53
CD70
CD74
CD80
CD83
CD86
CDA
CDC34
CDC42EP1
CDC42EP3
CDCP1
CDH11
CDH18
CDH3
CDH4
CDK5R2
CDKN2A
CDR1
CDR2L
CDSN
CEACAM4
CECR6
CENPQ
CFL2
CFLAR
CHAT
CHGA
CHRNB1
CHST3
CHSY3
CIDEC
CIITA
CILP2
CKLF
CKM
CKMT2
CLCA2
CLCA4
CLDN1
CLDN9
CLDND1
CLEC10A
CLEC2B
CLEC4A
CLEC5A
CLEC7A
CLIC4
CLIC5
CLIP2
CLSTN1
CLTC
CLVS1
CMKLR1
CMTM1
CMTM3
CMTM7
CMTM8
CMYA5
CNIH3
CNN3
CNNM4
CNTLN
CNTN2
CNTN6
COL10A1
COL11A1
COL11A2
COL12A1
COL17A1
COL21A1
COL22A1
COL4A6
COL6A1
COL6A2
COL6A3
COL7A1
COL8A1
COL8A2
COLEC12
CORO1A
CORO1C
COTL1
CPA3
CPD
CPNE2
CPNE7
CPNE9
CPPED1
CRABP2
CREB5
CRTAM
CSAG1
CSF1
CSF1R
CSF2RA
CSK
CSMD2
CSMD3
CSPG5
CST6
CSTA
CTHRC1
CTNNA2
CTNNB1
CTSB
CTSC
CTTNBP2NL
CX3CL1
CX3CR1
CXCL10
CXCL11
CXCL14
CXCL5
CXCL9
CXCR2P1
CXorf57
CXorf64
CYBB
CYP1B1
CYP27B1
CYP2S1
CYP46A1
CYP7B1
CYR61
CYS1
CYSLTR1
CYTH3
CYTH4
DAB2
DAPK3
DAPP1
DBC1
DCAF12
DCAF15
DCBLD1
DCBLD2
DCLRE1B
DCUN1D5
DDN
DDO
DDX53
DDX58
DDX60
DDX60L
DFNA5
DHDH
DHRS2
DHRS9
DHX40
DIO1
DIRAS3
DIRC3
DKFZp434J0226
DKK1
DLEU2
DLGAP3
DLK2
DLX3
DLX5
DLX6
DMBX1
DMC1
DMRT2
DMRT3
DNAJB1
DNAJB4
DNAJC22
DNAJC8
DNM1
DNM3
DNTTIP1
DOC2A
DOCK11
DOCK8
DOK2
DOK5
DPF3
DPP4
DPY19L1
DPYD
DR1
DSC3
DSE
DSG3
DST
DTX3L
DUSP10
DUSP14
DUSP2
DUSP5P
DUSP7
DUSP9
ECE1
ECM1
EDIL3
EDN2
EFEMP1
EFHD1
EFHD2
EFNB1
EFR3B
EGFR
EGOT
EGR4
EHD1
EHD4
EHHADH
EIF5A2
ELAVL2
ELF4
ELFN2
ELK3
ELOVL3
EMB
EML6
EMP1
EMP3
EMR1
EN2
ENDOD1
ENO1
ENTHD1
EPB41L2
EPHA2
EPHB2
EPSTI1
EREG
ERGIC2
ERRFI1
ESR1
ESYT1
ETNK2
EVI2A
F13A1
FABP3
FABP4
FABP6
FADS6
FAM102A
FAM105B
FAM109A
FAM111B
FAM113B
FAM115C
FAM126A
FAM127A
FAM129A
FAM131A
FAM131B
FAM180A
FAM196B
FAM26E
FAM26F
FAM3C
FAM55C
FAM5B
FAM70A
FAM7A3
FAP
FAS
FAT2
FBLN1
FBLN5
FBN1
FBXL13
FBXO17
FBXO32
FBXO6
FCER1G
FCGBP
FCGR1A
FCGR1B
FCGR1C
FCGR2A
FCGR2B
FCGR2C
FCGR3A
FCHO1
FCRLB
FERMT3
FEZ2
FGD2
FGD3
FGF5
FGFBP1
FGL2
FHL3
FHOD3
FIBCD1
FIBIN
FIGNL1
FIGNL2
FILIP1L
FJX1
FLJ10357
FLJ36031
FLJ42709
FLNA
FMNL3
FMO4
FN1
FNDC3B
FNDC5
FNIP2
FOSL1
FOXC1
FOXD2
FOXE1
FOXN2
FOXP3
FOXQ1
FPR1
FPR3
FRG2
FRG2B
FRG2C
FRMD4A
FRMD4B
FRMD5
FRMD6
FSCN1
FSTL1
FUT7
FXR1
FXYD5
FYB
FYN
FYTTD1
FZD2
G0S2
GABBR2
GADD45A
GAGE4
GAL3ST4
GALNT10
GALNT3
GALR2
GAP43
GAS1
GATA3
GATAD2A
GBE1
GBP1
GBP2
GBP3
GBP4
GBP5
GBP6
GCA
GCK
GDF11
GDF5
GDF6
GFPT2
GIMAP2
GIMAP4
GJA3
GJB2
GJB3
GJB4
GJB5
GJB6
GLB1L3
GLIPR1
GLIPR2
GLIS2
GLIS3
GLO1
GLS
GLT25D1
GLT8D2
GLYATL2
GMFG
GMIP
GMPS
GNA12
GNA13
GNA15
GNAI2
GNAI3
GNAO1
GNASAS
GNB4
GNG10
GNG11
GNG12
GNGT2
GOLIM4
GOLT1B
GPBAR1
GPC4
GPC6
GPN1
GPR110
GPR120
GPR137B
GPR156
GPR172B
GPR176
GPR180
GPR19
GPR34
GPR65
GPR68
GPR84
GPR85
GPR87
GPR88
GPRIN1
GPSM1
GPSM2
GPX1
GPX8
GRAMD3
GRB2
GREB1L
GREM1
GRIA3
GRIN2D
GRM3
GRM5
GRM6
GSDMA
GTSF1
GXYLT2
GYG1
H3F3B
H3F3C
HAPLN3
HAPLN4
HAS2
HAS2AS
HAS3
HAUS8
HAVCR2
HCG4
HCK
HCP5
HCST
HDAC9
HERC5
HERC6
HES2
HHATL
HHIP
HHIPL1
HHLA2
HHLA3
HIP1
HIVEP3
HLA-B
HLA-DMA
HLA-DMB
HLA-DOA
HLA-DOB
HLA-DPA1
HLA-DPB1
HLA-DQA1
HLA-DQA2
HLA-DQB1
HLA-DQB2
HLA-DRA
HLA-DRB1
HLA-DRB6
HLA-E
HLA-F
HLA-G
HLA-H
HMGA2
HMGN4
HOMER3
HOXA1
HOXA10
HOXA11
HOXA2
HOXA3
HOXA4
HOXD1
HPGDS
HPRT1
HPS3
HRASLS
HRH1
HS3ST1
HS3ST3A1
HS3ST5
HS6ST3
HSD11B1
HSD3B7
HSN2
HSPA6
HSPB1
HTR1D
HTR7
ICAM1
ICAM4
IDS
IER5
IFFO1
IFFO2
IFI16
IFI27L2
IFI35
IFI44
IFI44L
IFI6
IFIH1
IFIT1
IFIT2
IFIT3
IFIT5
IFNAR1
IFNAR2
IFNGR2
IFT57
IGF2BP2
IGFBP3
IGFBP6
IGFL1
IGFL2
IGSF21
IGSF6
IKBIP
IL10
IL10RB
IL12RB1
IL15RA
IL17RD
IL1A
IL1B
IL1F5
IL1F7
IL1F9
IL1RAP
IL1RL1
IL20RB
IL21R
IL22RA1
IL23A
IL27
IL27RA
IL32
IL4I1
IL7
ILDR2
INA
INHBA
INHBB
INPP1
IPCEF1
IRF5
IRF7
IRX4
ISG15
ISL2
ISLR
ISY1
ITGA2
ITGA3
ITGA5
ITGA6
ITGAM
ITGAV
ITGB2
ITGB3
ITGB7
ITGB8
ITPKA
IVL
JOSD1
JPH3
KCNA7
KCNG1
KCNG3
KCNJ14
KCNK12
KCNK13
KCNK2
KCNK5
KCNMB1
KCNN4
KCNQ5
KCTD10
KCTD12
KCTD5
KDELC1
KDELR3
KDR
KIAA0226
KIAA0802
KIAA0922
KIAA1524
KIAA1949
KIF5A
KIF7
KIRREL
KIRREL2
KIRREL3
KLC3
KLF8
KLHDC10
KLHL4
KLHL7
KLK5
KLRG2
KPNA4
KREMEN2
KRT14
KRT19
KRT20
KRT23
KRT5
KRT80
KRT9
KRTAP3-1
L1CAM
LACTB
LAG3
LAIR1
LAMA1
LAMC2
LAPTM5
LAT2
LAYN
LCP1
LCP2
LCT
LDHB
LDLR
LDLRAD3
LDOC1
LGALS1
LGALS12
LGALS2
LGALS9
LHB
LHFPL2
LHFPL4
LILRA6
LILRB2
LILRB4
LIMK1
LIN28B
LINGO2
LIPG
LIPH
LMBR1
LMCD1
LOC100130776
LOC100133669
LOC100216001
LOC100270710
LOC100302401
LOC134466
LOC152225
LOC154761
LOC220930
LOC254559
LOC255167
LOC283392
LOC284578
LOC285830
LOC342346
LOC389458
LOC399959
LOC400696
LOC400759
LOC401397
LOC441204
LOC441666
LOC606724
LOC647121
LOC651250
LOC653653
LOX
LOXL3
LPAR2
LPAR5
LPO
LPXN
LRCH2
LRFN1
LRIG3
LRRC25
LRRC3
LRRC42
LRRC55
LRRC8A
LRRC8C
LRRN4
LRRN4CL
LRRTM1
LSP1
LST1
LTBP1
LUZP1
LUZP6
LY6E
LY6H
LY6K
LY75
LY86
LYNX1
LYPD5
LYSMD2
LYST
MACC1
MAD2L2
MAEL
MAFB
MAGEB2
MAGEC2
MAGI3
MAML2
MANBA
MAP1LC3C
MAP1S
MAP3K13
MAP7D1
MAP7D2
MAP7D3
MAPKAPK3
MARCH1
MARCH4
MARCO
MARVELD1
MAT1A
MBOAT2
MCF2
MCM2
MCM5
MCM6
MCOLN2
MCOLN3
MDFIC
MDGA2
MED10
MED12L
MEF2C
MEGF11
MEIS3
MESP2
MET
METRNL
MEX3D
MFAP2
MFAP5
MFGE8
MFI2
MFSD1
MFSD4
MGAM
MGAT3
MGAT5B
MICAL2
MICB
MIER1
MIER2
MLF1
MMD
MME
MMP11
MMP13
MMP14
MMP2
MMP28
MMP3
MMP7
MNDA
MOBKL2B
MOBKL2C
MPEG1
MPP2
MPP4
MRC1
MRC2
MRPL47
MRPS6
MS4A4A
MS4A6A
MSC
MSR1
MSX1
MSX2
MT1A
MT1E
MT1F
MT1L
MT1M
MT1X
MT2A
MTMR3
MTTP
MUC16
MUC21
MUL1
MX1
MXRA5
MXRA7
MYADM
MYBPH
MYBPHL
MYC
MYD88
MYH15
MYH16
MYL9
MYO1F
MYO1G
MYO3B
MYO5A
MYO9B
NAB1
NAB2
NAGS
NAV3
NBL1
NCCRP1
NCEH1
NCF2
NCF4
NCK1
NCKAP1L
NCRNA00152
NCRNA00181
NCS1
NDRG4
NDUFA12
NECAP2
NEDD4
NEFH
NET1
NETO1
NEURL3
NEXN
NFAM1
NFKBIE
NGEF
NIPAL4
NKAIN4
NKAPL
NKX2-8
NKX3-2
NLRC4
NLRP12
NLRP3
NMD3
NMI
NMNAT2
NOL11
NOTCH2
NOX4
NPBWR1
NPC1
NPEPPS
NPTX2
NR2E1
NRIP1
NRM
NRP1
NRP2
NRXN2
NSUN5
NT5DC2
NT5E
NTAN1
NTM
NTRK1
NTSR1
NUDT1
NUDT11
NUMBL
NXN
OAF
OAS2
OAZ1
OBFC2A
ODZ2
OGFOD1
OGFRL1
OLFM1
OLR1
OPTN
ORAI2
OSCAR
OSGIN2
OSMR
OSR2
OTP
OVOL1
OXCT1
OXTR
P2RX7
P2RY12
P2RY13
P2RY6
PADI1
PADI2
PAG1
PAGE2
PAGE2B
PALLD
PAPL
PAQR3
PARD6B
PARL
PARP12
PARVG
PCDH7
PCDH8
PCDH9
PCDHA5
PCDHB13
PCDHB14
PCDHB15
PCDHB16
PCDHB17
PCDHB9
PCDHGA11
PCDHGA8
PCDHGB8P
PCDHGC5
PCOLCE
PDCD1
PDCD1LG2
PDE1B
PDGFRA
PDLIM3
PDLIM4
PDLIM5
PDLIM7
PDPN
PDZD7
PEA15
PECR
PEG10
PER3
PEX5L
PF4
PFKFB3
PFKFB4
PGA3
PGAM1
PGM1
PHF13
PHF19
PHLDA1
PHLDA2
PHLDB1
PHLDB2
PI3
PI4K2A
PIK3AP1
PIK3CA
PIK3CD
PIK3R2
PIK3R6
PILRA
PIM1
PIP4K2A
PKP2
PLA2G15
PLA2G16
PLA2G4C
PLA2G4D
PLAC1
PLAT
PLAU
PLAUR
PLB1
PLBD1
PLCH2
PLCXD2
PLD4
PLD5
PLEK
PLEK2
PLEKHA4
PLEKHG1
PLEKHG4
PLEKHO1
PLEKHO2
PLIN1
PLIN2
PLIN3
PLK3
PLOD1
PLOD2
PLS3
PLSCR1
PLXDC2
PLXNA1
PLXNC1
PMAIP1
PMEPA1
PML
PNMAL1
PNPO
PODNL1
POLE3
POM121L2
PON1
PON2
POT1
POU3F2
PPAPDC1A
PPARG
PPAT
PPFIBP1
PPM1N
PPP1R14C
PPP2R2B
PPT1
PPYR1
PRELID2
PRIC285
PRICKLE1
PRIM2
PRKCA
PRKD3
PRNP
PROCR
PRR16
PRR4
PRRX1
PRRX2
PRSS22
PRSS3
PSMB9
PSMD12
PSMD2
PSORS1C1
PTAFR
PTGS1
PTK7
PTPN1
PTPN13
PTPN22
PTPN5
PTPRG
PTPRO
PTPRQ
PTRF
PTX3
PVRL3
PXDN
PXN
PYCARD
QKI
RAB11FIP5
RAB32
RAB38
RAB42
RAB8A
RAB8B
RAC1
RAC2
RAD9B
RAI14
RALB
RANBP3L
RANBP6
RAP1A
RAP1B
RAP2B
RARRES1
RARRES3
RASA2
RASAL2
RASGEF1C
RASGRF1
RASGRP3
RASGRP4
RASSF8
RBM11
RBMS1
RBMS3
RBP1
RCC1
RCC2
RCN1
RCN3
RECK
RECQL
RELL1
REN
REP15
RFC2
RFPL1S
RFX8
RGL1
RGS10
RGS11
RGS17
RGS18
RGS19
RGS20
RHBDF2
RHBDL2
RHCG
RHEBL1
RHOBTB3
RHOC
RHOF
RHOXF1
RIN1
RIPK2
RLN2
RNASE2
RNASE3
RNASE6
RNASE7
RNASEH2A
RND3
RNF149
RNF19A
RNF212
RNF216L
RNF222
RNF43
RNF7
RNFT1
ROPN1B
ROR1
RPA3
RPL39L
RPSAP52
RRAD
RRAS
RSAD2
RTBDN
RTN1
RTN2
RTP4
RYR1
S100A1
S100A10
S100A13
S100A16
S100A2
S100A4
S100A5
S100A7
S100A8
S100B
S1PR2
S1PR5
SAA1
SAA2
SACS
SALL1
SAMD4A
SAMD9
SAMD9L
SAMHD1
SBDS
SBSN
SCD5
SCN5A
SCUBE3
SDC1
SDC3
SDC4
SEC22A
SEC23A
SECTM1
SELPLG
SEMA3C
SEMA7A
SENP2
SEPT11
SEPT7
SERPINB2
SERPINB7
SERPIND1
SERPING1
SERPINH1
SERTAD2
SFXN3
SGCE
SGCG
SGEF
SH2B3
SH2D2A
SH2D4B
SH3BGRL3
SH3BP1
SH3GL1
SH3GLB1
SH3RF2
SHANK1
SHCBP1
SHISA3
SHISA5
SHOX2
SIGLEC1
SIGLEC10
SIGLEC11
SIGLEC16
SIGLEC5
SIGLEC7
SIGLEC9
SIGLECP3
SIGMAR1
SIRPA
SIRPB1
SIRPB2
SKA2
SKAP2
SLAMF8
SLAMF9
SLC10A3
SLC13A3
SLC15A3
SLC16A1
SLC16A3
SLC16A9
SLC17A7
SLC18A3
SLC1A3
SLC1A7
SLC20A2
SLC25A19
SLC25A42
SLC26A10
SLC28A3
SLC2A12
SLC2A5
SLC31A2
SLC34A2
SLC35D3
SLC35F2
SLC35F4
SLC37A2
SLC39A10
SLC39A2
SLC5A3
SLC6A20
SLC7A7
SLC8A2
SLC9A6
SLCO2B1
SLCO3A1
SLFN11
SLFN12
SLFN5
SLITRK1
SMAGP
SMC1B
SMC4
SMPX
SMURF2
SNAI2
SNCA
SNX10
SNX15
SNX18
SNX20
SNX21
SNX32
SNX8
SOHLH2
SORBS1
SP100
SPATS2L
SPHK1
SPI1
SPINK13
SPINK2
SPNS3
SPOCD1
SPOCK1
SPP1
SPRED1
SPRR1B
SPRR2A
SPRR2C
SPRR2D
SPRR2E
SPRR2F
SPTB
SRD5A1
SRGN
SRPX
SRPX2
SRRM3
SSPN
SSR3
ST6GALNAC5
ST7OT1
ST8SIA4
STAC
STAC3
STAG3
STAMBPL1
STARD3NL
STAT1
STAT5A
STBD1
STEAP1
STK10
STK11
STK17A
STK39
STMN3
STRADB
STX1B
STXBP6
SUCNR1
SUGT1P1
SULF1
SULT4A1
SUMO3
SUN3
SUSD4
SUSD5
SYCP2
SYNGR3
SYNJ1
SYT12
SYTL2
TAF7L
TAGLN3
TAP1
TAP2
TBC1D23
TBX21
TCAM1P
TCEAL7
TCF19
TCP11L1
TDRD7
TEX11
TEX9
TFAP2A
TFEC
TFPI2
TFR2
TGFB1
TGFB2
TGFBI
TGFBR2
TGM4
THBS2
THEG
THOC4
TIAM1
TICAM1
TIMP2
TIMP3
TIMP4
TIPARP
TK1
TLR2
TLR7
TLR8
TLX2
TM4SF19
TM6SF2
TM7SF4
TMC8
TMEM106A
TMEM156
TMEM158
TMEM169
TMEM171
TMEM191A
TMEM195
TMEM200B
TMEM217
TMEM27
TMEM39B
TMEM40
TMEM41A
TMEM43
TMEM51
TMEM63C
TMEM90A
TMEM90B
TMIE
TMOD2
TMPRSS11D
TNC
TNFAIP2
TNFAIP6
TNFAIP8
TNFAIP8L2
TNFRSF12A
TNFRSF8
TNFRSF9
TNFSF10
TNFSF13B
TNFSF4
TNIK
TNIP3
TNMD
TNNC1
TNNC2
TNNT1
TNS3
TOX2
TPBG
TPM4
TPSAB1
TPSB2
TPSD1
TPST1
TRAM1
TRANK1
TREM2
TRHDE
TRIB1
TRIL
TRIM14
TRIM36
TRIM47
TRIM48
TRIM50
TRIM55
TRIM59
TRIP10
TRIP13
TRPA1
TRPV2
TRPV3
TSC22D2
TSHZ3
TSPAN5
TTC26
TTYH1
TTYH3
TUBA1A
TUBA1B
TUBA3C
TUBA4A
TUBB
TUBB6
TUSC5
TWF2
TWIST2
TWISTNB
TYROBP
UBA6
UBA7
UBE2E2
UBE2L6
UCA1
UCN2
UCN3
UGT1A10
UGT1A8
ULBP1
ULBP2
ULBP3
UNC13D
UNC5B
UPB1
UPK2
UPP1
USH1G
USP18
USP25
USP4
VAMP3
VASN
VAT1
VAT1L
VAV1
VCAM1
VCL
VCX3A
VEGFC
VEPH1
VEZF1
VGLL1
VIM
VPS37B
VSIG1
VSIG4
VSNL1
VSTM1
VWDE
WDR66
WDR87
WDR91
WFDC10B
WLS
WNT10A
WNT7A
XAF1
XIRP1
XPR1
YEATS2
YPEL2
ZBED2
ZBTB47
ZDHHC15
ZFP36L1
ZFP37
ZFP57
ZFP82
ZFPM2
ZFR2
ZIC2
ZIC5
ZIK1
ZNF100
ZNF114
ZNF208
ZNF256
ZNF257
ZNF267
ZNF341
ZNF365
ZNF382
ZNF391
ZNF404
ZNF43
ZNF430
ZNF431
ZNF486
ZNF488
ZNF492
ZNF493
ZNF501
ZNF530
ZNF534
ZNF542
ZNF560
ZNF578
ZNF626
ZNF667
ZNF676
ZNF677
ZNF682
ZNF714
ZNF718
ZNF727
ZNF732
ZNF737
ZNF788
ZNF804A
ZNF826
ZNF835
ZNF85
ZNF876P
ZNF880
ZNF883
ZNF93
ZNF98
ZNFX1
ZNHIT6
ZPLD1
ZSCAN1
ZSCAN23
ZSWIM4
ZYG11A
ZYX

## Sheet: Up-regulated in KL
TCGA	CCLE	Merged
A2BP1	ABCB6	ABCB6
ABCA5	ABCC2	ABCC2
ABCB4	ABCG1	AKR1B10
ABCB6	ABHD4	AKR1C1
ABCC2	ABLIM1	AKR1C2
ABCC4	ACOT13	AKR1C3
ABCC8	AKAP12	ALDH3A1
ABHD14A	AKR1B10	ALDH3A2
ABLIM2	AKR1C1	CARD14
ABO	AKR1C2	CBR1
ABP1	AKR1C3	CES1
ACACB	ALDH1A1	CHMP1B
ACADSB	ALDH3A1	CLU
ACADVL	ALDH3A2	CPLX2
ACAT1	AQP3	CPS1
ACCS	ARRDC2	CSGALNACT1
ACE2	ASCC1	CXXC1
ACHE	ASRGL1	CYP24A1
ACIN1	ASS1	CYP4F11
ACSL3	BICC1	CYP4F3
ACTC1	BMP7	ENO3
ACTR3C	CARD14	FECH
ADAMTS19	CBR1	FGA
ADAMTSL3	CCND3	FGB
ADARB2	CEACAM5	FGG
ADCK1	CEBPB	GABARAPL1
ADCK4	CES1	GCLM
ADCK5	CES1P1	GPX2
ADCYAP1	CFD	GSR
ADH1C	CHMP1B	IER3IP1
ADHFE1	CLCC1	KIF1A
ADI1	CLU	KRT83
ADPRHL1	CP	LGSN
ADRA2A	CPLX2	MAP2
ADRA2C	CPS1	MUC13
ADSSL1	CREM	NNMT
AFF2	CSGALNACT1	NR4A2
AFF3	CSRP1	OSGIN1
AFG3L1	CTGF	PCSK9
AGA	CXXC1	PDE4D
AGAP1	CYP24A1	PGD
AGAP4	CYP4F11	PPP2R2C
AGAP5	CYP4F3	PTGR1
AGAP6	DMBT1	PTP4A1
AGAP8	DMTN	RASD1
AGBL4	DNAJB4	RFK
AGPHD1	DNAJC1	RND1
AGR2	DXO	RSPO3
AGXT2L1	EDN1	SEC11C
AHCYL2	EFNA1	SIK1
AIFM1	EID3	SLC16A4
AIFM2	ENO3	SLC7A11
AKR1B10	EVA1C	SLC7A2
AKR1C1	FECH	SPDEF
AKR1C2	FGA	TACC2
AKR1C3	FGB	TESC
AKR7L	FGG	TFF1
ALAD	FLRT3	UBXN8
ALCAM	FTL	UGDH
ALDH2	GABARAPL1
ALDH3A1	GCLC
ALDH3A2	GCLM
ALDH3B1	GCNT3
ALDH3B2	GDPD3
ALDH6A1	GLRX
ALDH7A1	GPRIN3
ALG13	GPX2
ALG5	GRAMD1B
ALOX12P2	GSR
ALPL	HAVCR1
AMBP	HHIPL2
AMN	HKDC1
AMPH	HOXC10
ANG	HOXC13
ANGPTL3	HPD
ANK2	ID3
ANKMY1	IER3IP1
ANKRD16	IL11
ANKRD35	KCTD15
ANKRD45	KIF1A
ANKRD9	KIF21B
ANKS4B	KIFC3
ANKZF1	KLF13
ANO9	KRT81
ANXA10	KRT83
AP1G2	LANCL1
APBB3	LANCL2
APOA1BP	LGSN
APOF	LINC00473
APOM	LPGAT1
AQP2	MAGEA1
AQP5	MAGEA4
AQP6	MAGEC2
AQP7	MAP2
AR	MATN2
ARFIP2	MTHFD2
ARHGAP26	MUC13
ARHGAP39	MUC5AC
ARHGAP5	NCOA7
ARHGEF10	NEIL3
ARHGEF11	NFKB2
ARRB1	NNMT
ARSA	NQO2
ART5	NR4A1
ARTN	NR4A2
ASAH1	NRG1
ASB16	NUAK2
ASB9	NUPR1
ASCL1	OSGIN1
ASCL2	OSGIN2
ASPG	PAQR5
ASXL3	PCBD1
ATF4	PCSK9
ATG2B	PDE4D
ATHL1	PECR
ATOH8	PGD
ATP1A1	PMP22
ATP1B1	POF1B
ATP1B2	PPP2R2C
ATP2A3	PRDX1
ATP2C2	PTGR1
ATP5A1	PTP4A1
ATP6V1B1	RAB10
ATP7B	RASD1
ATP8A1	RBM24
ATP8A2	RFK
ATP8B1	RHOV
ATP9B	RIOK1
ATXN7L1	RND1
AUH	RPL22L1
AVPI1	RPS27L
AVPR1A	RSPO3
B3GALT2	SAT1
B3GNT6	SEC11C
B4GALNT2	SIK1
BAALC	SLC16A4
BACE2	SLC30A1
BAG1	SLC47A1
BAHCC1	SLC7A11
BAI1	SLC7A2
BARX1	SLC7A7
BASE	SMAD2
BASP1	SMOC1
BAT1	SPDEF
BAT5	SPP1
BBS1	SPPL2A
BCAN	SULT1A1
BCAS1	TACC2
BCDIN3D	TAF13
BCL2L2	TDP2
BEND7	TESC
BFAR	TFF1
BFSP1	TIMELESS
BHLHA15	TRIM29
BHMT	TXNRD1
BMP6	UBXN8
BMS1P4	UGDH
BMX	ULK2
BPHL	YRDC
BPIL1
BRD2
BRD8
BRF1
BRSK2
BSCL2
BTG1
BTG2
C10orf108
C10orf32
C10orf57
C10orf71
C10orf81
C11orf16
C11orf49
C11orf53
C12orf56
C13orf23
C14orf101
C14orf147
C14orf167
C14orf184
C14orf79
C14orf86
C15orf50
C16orf3
C16orf7
C16orf89
C17orf28
C17orf68
C17orf76
C17orf85
C18orf32
C19orf21
C19orf54
C19orf63
C1GALT1C1
C1orf114
C1orf115
C1orf161
C1orf168
C1orf210
C1orf230
C1orf27
C1orf43
C1orf56
C1orf57
C1orf64
C1orf69
C1orf95
C2
C20orf114
C20orf134
C20orf186
C20orf197
C20orf56
C20orf70
C20orf96
C21orf125
C21orf130
C22orf32
C2CD4D
C2orf28
C4orf52
C5
C5orf27
C5orf30
C6orf136
C6orf138
C6orf176
C6orf201
C6orf217
C7orf41
C8A
C8B
C8G
C8orf30A
C8orf4
C8orf47
C8orf55
C8orf56
C8orf75
C8orf84
C9orf125
C9orf152
C9orf91
CA12
CA8
CABLES1
CABP4
CABYR
CACNA1D
CACNA1H
CACNA2D2
CACNA2D3
CACNB2
CADM4
CALB1
CALCA
CALCB
CALML3
CAMK2B
CAMKK1
CAPN10
CAPN13
CAPN14
CAPN5
CAPN6
CAPN9
CAPS2
CARD14
CARKD
CARNS1
CATSPER2P1
CATSPER3
CATSPERB
CBR1
CBR3
CBX2
CCAR1
CCDC125
CCDC129
CCDC149
CCDC154
CCDC25
CCDC57
CCDC64
CCDC88C
CCK
CCL15
CCS
CD302
CD38
CD46
CD55
CD63
CD81
CD99L2
CDC20B
CDC42EP5
CDH15
CDH26
CDHR2
CDHR3
CDK2AP2
CDON
CDRT1
CDRT4
CEL
CELF2
CELF3
CELSR1
CEP250
CERK
CES1
CES4
CFHR1
CGA
CHD1L
CHD3
CHD7
CHID1
CHKA
CHKB
CHKB-CPT1B
CHL1
CHML
CHMP1B
CHMP7
CHODL
CHP
CHPT1
CHRDL2
CHRNA3
CHRNA4
CHRNA5
CHRNA9
CHST10
CIT
CKMT1A
CLCNKA
CLCNKB
CLDN10
CLDN2
CLEC3B
CLMN
CLU
CMAH
CMTM4
CNGA3
CNGB3
CNOT7
CNPY2
CNST
CNTN3
CNTN4
CNTROB
COG2
COG3
COG7
COL25A1
COLEC10
COLEC11
COQ4
COQ6
COX18
CPE
CPLX2
CPS1
CPT1A
CPT1B
CRABP1
CREB3L1
CREB3L4
CREG1
CRELD2
CRHR2
CRIP3
CRIPAK
CRISP3
CRLF1
CROCCL1
CROCCL2
CRY2
CSGALNACT1
CSMD1
CSNK1A1P
CSPP1
CST3
CTAGE1
CTAGE5
CTNND2
CTNS
CTPS2
CTTN
CUZD1
CXXC1
CXXC4
CYB561
CYB5D2
CYP24A1
CYP2A6
CYP2B6
CYP2B7P1
CYP4A11
CYP4B1
CYP4F11
CYP4F3
CYP4Z1
CYP4Z2P
CYTSB
D2HGDH
DAAM2
DACT2
DAPK2
DCAF11
DCAF12L2
DCAF8
DCTN1
DCTN6
DCXR
DDC
DDIT4L
DDRGK1
DDX51
DECR1
DEFB1
DGAT1
DHRS13
DHRSX
DHTKD1
DIS3L
DIS3L2
DISC1
DLL1
DLST
DMRTA1
DMRTC1B
DNAH17
DNAH7
DNAJC10
DNAJC12
DNAL1
DOC2B
DOCK5
DOK6
DPAGT1
DPP3
DPY19L3
DRP2
DSG1
DSG4
DTNB
DUOX1
DUOXA1
DUOXA2
DUSP1
DUSP16
DUSP22
DUSP4
EARS2
EBAG9
EBPL
EDA
EFCAB2
EFCAB4A
EFCAB4B
EGFL7
EGLN1
EIF2C4
ELAVL4
ELL3
ELMO1
ELP3
EML2
ENAM
ENO3
ENOSF1
ENSA
ENTPD4
ENTPD8
EPAS1
EPB49
EPHA7
EPHX1
EPHX2
EPS8L3
ERGIC1
ERGIC3
ERLIN2
ERN2
ERO1LB
ERP29
ETS2
EVPLL
EXTL1
EYS
F2
F2RL3
F3
F7
FAAH2
FAIM2
FAM105A
FAM107B
FAM108C1
FAM160B2
FAM164C
FAM165B
FAM174A
FAM174B
FAM177A1
FAM177B
FAM181A
FAM184B
FAM190B
FAM196A
FAM19A5
FAM22A
FAM22D
FAM41C
FAM46A
FAM59A
FAM63A
FAM83E
FAM84A
FAM9C
FASN
FASTKD5
FBXL6
FBXO16
FBXO25
FBXO38
FBXW4
FBXW5
FCAR
FECH
FFAR2
FGA
FGB
FGG
FGL1
FILIP1
FKBP11
FKBP2
FLJ10661
FLJ22536
FLJ35776
FLJ42875
FLJ44606
FMNL2
FN3K
FNDC3A
FOXA1
FOXA3
FOXH1
FOXI3
FOXN4
FOXO1
FOXO4
FOXP1
FOXP2
FRAT1
FRAT2
FRMPD2
FRS3
FSTL4
FURIN
FUT2
FXR2
FXYD3
FXYD4
FZD10
FZD3
FZD4
G6PC3
G6PD
GAB2
GABARAPL1
GABPB2
GABRA2
GABRB3
GABRR1
GADD45G
GAK
GAL
GALNT2
GALNT4
GALNT7
GALNTL6
GAS8
GATSL3
GCH1
GCLM
GCNT2
GFOD2
GFRA3
GGT6
GGT7
GIGYF1
GK
GK3P
GKAP1
GKN2
GLCE
GLTPD2
GLTSCR1
GMDS
GMPPB
GNAI1
GNAL
GNMT
GNS
GOLGA2B
GOLGA6L1
GOLGA6L10
GOLGA6L6
GOLGA6L9
GOLGA7B
GOLGA8C
GOLM1
GP2
GPAA1
GPHN
GPR109A
GPR109B
GPR111
GPR133
GPR20
GPR35
GPR39
GPR77
GPR89C
GPR98
GPRC5C
GPT
GPT2
GPX2
GRAMD1A
GRAMD4
GREB1
GREM2
GRIK5
GRIN2A
GRINA
GRIPAP1
GRK1
GSR
GSTA1
GSTP1
GUCA2B
GUCY1B2
GULP1
GYG2
H19
HAL
HAP1
HAR1B
HARS2
HBA1
HBA2
HBB
HCN4
HDHD2
HEATR5A
HEATR7A
HECTD1
HEPACAM2
HES6
HGD
HGSNAT
HHAT
HINT1
HIPK2
HIST1H3E
HIST1H4H
HIST3H2A
HMBOX1
HMGB3
HMGCS2
HNF1A
HNRNPA0
HOXB2
HOXB8
HOXC9
HOXD11
HOXD13
HP
HPN
HPR
HPX
HRC
HS1BP3
HS6ST1
HSD11B2
HSD17B11
HSD17B13
HSD17B2
HSD17B4
HSD17B7
HSD17B7P2
HSF4
HSP90B1
HSPA5
HSPA9
HTATIP2
HTR1F
HTR2C
HUNK
HYOU1
ICA1
ID1
ID4
IDE
IDH1
IDH2
IER3IP1
IGFALS
IGFBP1
IGFBP2
IGFBP5
IL19
IMPA2
INHA
INPPL1
INSL4
INSM1
INSR
INTS10
INTS3
IP6K3
IPW
IRF2BP1
IRS2
IRX3
IRX5
IRX6
ISOC1
ITFG2
ITPKB
ITPR1
IYD
JAKMIP3
JMJD7-PLA2G4B
KBTBD11
KBTBD7
KC6
KCNC2
KCNE3
KCNE4
KCNH2
KCNJ1
KCNJ11
KCNJ16
KCNJ8
KCNK1
KCNK10
KCNK3
KCNK9
KCNMB4
KCNQ1
KCNU1
KCTD1
KCTD3
KHDC1L
KHDRBS3
KIAA0114
KIAA0141
KIAA0146
KIAA0182
KIAA0232
KIAA0284
KIAA0317
KIAA0319
KIAA0430
KIAA0467
KIAA0564
KIAA0649
KIAA0895L
KIAA1012
KIAA1109
KIAA1244
KIAA1324
KIAA1328
KIAA1383
KIAA1530
KIAA1549
KIAA1598
KIAA1737
KIAA1875
KIAA1967
KIAA1984
KIF13B
KIF19
KIF1A
KIF1C
KIF21A
KIF26A
KIR2DL1
KIR2DL3
KIR2DS4
KIR3DL1
KIR3DL2
KIR3DX1
KIT
KL
KLB
KLF15
KLF3
KLF5
KLHDC2
KLHDC4
KLHL25
KLHL32
KLHL8
KLK11
KLK12
KLK13
KLK14
KREMEN1
KRT13
KRT83
KRTCAP2
KSR1
KYNU
L3MBTL4
LAMP1
LANCL3
LARGE
LCN12
LDHD
LDOC1L
LEFTY1
LEPR
LEPROTL1
LETMD1
LGALS4
LGI2
LGSN
LGTN
LILRA2
LILRP2
LIMCH1
LINGO4
LIPT2
LMAN2
LMO4
LNX2
LOC100128675
LOC100129066
LOC100131551
LOC100132111
LOC100133985
LOC100190940
LOC100268168
LOC100271836
LOC116437
LOC145837
LOC146336
LOC150622
LOC154822
LOC157381
LOC200030
LOC253039
LOC284276
LOC285629
LOC286002
LOC339047
LOC388152
LOC619207
LOC643763
LOC646471
LOC646762
LOC647309
LOC653566
LOC728190
LOC728606
LOC728723
LOC80154
LONRF3
LPAR1
LPAR3
LPIN2
LPL
LRBA
LRDD
LRFN2
LRIG1
LRP1B
LRP5
LRP5L
LRPAP1
LRRC10B
LRRC16B
LRRC2
LRRC26
LRRC27
LRRC37A4
LRRC56
LRRIQ4
LRRTM3
LRTM2
LYPD1
LYPD6
LYPD6B
LYSMD1
MAGEA8
MAGIX
MAMDC4
MAML3
MAN2A2
MAN2C1
MANF
MAOA
MAP2
MAP2K6
MAPK15
MAPK1IP1L
MAPK4
MARK1
MAST4
MBD6
MBLAC1
MCCC2
MCCD1
MCF2L
MCTP2
MDM4
ME1
MECOM
MED11
MED12
MED13L
MEGF9
MEIS2
METTL7A
MFSD10
MFSD3
MFSD9
MGC70857
MIA3
MIPEP
MLH3
MLPH
MOAP1
MOB2
MOSC1
MOSC2
MOSPD1
MPDU1
MPP7
MRAP2
MRPS36
MSI1
MSI2
MSLN
MSLNL
MSMB
MST1
MST4
MTMR10
MTMR7
MTNR1A
MTUS1
MTUS2
MUC12
MUC13
MUC5B
MUC6
MYBPC1
MYCL1
MYCN
MYH7B
MYLK3
MYO16
MYOM1
MYRIP
MYT1
N4BP2L2
NAA30
NAPB
NAPG
NARS
NBEA
NBPF4
NCKAP5
NCRNA00105
NCSTN
NDFIP1
NDUFA10
NDUFS1
NDUFV2
NEB
NECAB2
NECAB3
NEDD4L
NEK8
NELF
NEO1
NEURL
NEURL4
NEUROD1
NHEJ1
NLRP5
NMB
NNMT
NOS1
NOS2
NOSTRIN
NOTUM
NOX5
NOXA1
NPAS3
NPC1L1
NPIP
NPW
NQO1
NR0B1
NR1H4
NR3C1
NR4A2
NRG4
NRN1
NRN1L
NRXN3
NSMCE4A
NT5C
NTNG2
NTS
NUCB2
NUDT13
NUDT9
NXF3
NXPH1
NXT2
OAT
OBP2A
OBP2B
OBSCN
OBSL1
OCA2
ODC1
ODZ1
OPHN1
OPLAH
OPN3
ORM1
ORM2
OS9
OSBPL1A
OSBPL2
OSGIN1
OTUD7A
OVGP1
OVOL2
OXCT2
PACSIN2
PAEP
PAH
PAIP2B
PAK3
PAN2
PANK1
PANX2
PAPD5
PAPOLA
PAPPA
PAR-SN
PARK2
PARM1
PARN
PART1
PBLD
PBXIP1
PCBD2
PCCA
PCDH1
PCDH20
PCDHA13
PCDHB3
PCK1
PCM1
PCNT
PCOTH
PCSK1
PCSK2
PCSK9
PDCD4
PDE10A
PDE1C
PDE3A
PDE3B
PDE4D
PDE8A
PDE8B
PDIA2
PDIA3
PDIA3P
PDIA4
PDIA6
PDK4
PDXDC2
PEBP4
PECI
PELI2
PER1
PER2
PF4V1
PGAP3
PGC
PGD
PGS1
PHF17
PHF2
PHF8
PHKA1
PHKB
PHOX2B
PHPT1
PICK1
PIGM
PIGO
PIGT
PIK3C2G
PIK3C3
PILRB
PIM3
PIP5K1B
PIR
PITPNC1
PITPNM1
PITRM1
PITX2
PIWIL1
PKDCC
PKP1
PLA2G10
PLA2G2A
PLA2G3
PLA2G4A
PLA2G6
PLAC4
PLCB1
PLCB4
PLD3
PLEKHG2
PLEKHH1
PLUNC
PLXNB1
PMM1
PNKD
PNMA3
PNPLA7
POGZ
POLI
POLM
POLR3E
POLR3H
POMT1
POU5F1
POU5F1B
PPA2
PPAPDC1B
PPARGC1A
PPIB
PPM1A
PPM1H
PPP1R13B
PPP1R16A
PPP1R3B
PPP2R2C
PPPDE2
PRDM16
PRDX4
PRICKLE4
PRKAA2
PRKAB1
PRKACB
PRKRIP1
PRKY
PRMT8
PRPF40B
PRUNE
PSAPL1
PSD3
PSD4
psiTPTE22
PSORS1C3
PTCHD3
PTDSS2
PTGR1
PTGR2
PTP4A1
PTPLA
PTPRB
PTPRE
PTPRN2
PVT1
PXMP4
QDPR
R3HCC1
R3HDM2
RAB17
RAB26
RAB3C
RAB3IP
RAB40B
RAB40C
RAB4A
RABGGTA
RAD52
RALGAPA1
RANBP10
RANBP9
RANGRF
RAP1GAP
RASD1
RASSF9
RBBP9
RBM47
RBM4B
RBPMS2
RCOR3
RDH10
REG1A
RELN
RERGL
RET
RFK
RFTN1
RFX6
RGAG4
RGL2
RGS12
RGS6
RGS7
RHBDD3
RHOB
RHOBTB1
RHOBTB2
RHOU
RIMKLB
RMND5B
RNASE4
RND1
RNF145
RNF150
RNF180
RNF183
RNF187
RNF215
RORB
RORC
RPH3AL
RPN2
RPRM
RREB1
RSPO3
RUFY3
S100P
SALL3
SAMD13
SAMD5
SAPS2
SAT2
SATB1
SCAND2
SCCPDH
SCFD1
SCGB2A1
SCGB3A2
SCMH1
SCN1B
SCN3A
SCN9A
SCNN1A
SCNN1G
SCRIB
SDCBP2
SDF2L1
SDHAP1
SDHC
SDK1
SEC11C
SEC23B
SEC61A2
SECISBP2L
SELENBP1
SELO
SELS
SEMA3E
SEPHS1
SERPINA3
SERPINB3
SERPINB4
SERPINF2
SESTD1
SETBP1
SETD4
SETD6
SETDB1
SFRS16
SFRS17A
SFRS6
SFTPB
SGPP1
SGSM3
SH2D6
SH3BGRL2
SH3BP4
SHANK2
SHISA2
SHMT1
SHPK
SHROOM1
SIAE
SIGIRR
SIK1
SIL1
SIM2
SIPA1L2
SLC12A7
SLC14A2
SLC16A11
SLC16A12
SLC16A14
SLC16A4
SLC1A2
SLC22A18
SLC22A23
SLC22A3
SLC22A5
SLC24A3
SLC25A11
SLC25A15
SLC25A16
SLC25A18
SLC25A6
SLC26A1
SLC26A2
SLC26A4
SLC26A9
SLC27A4
SLC30A8
SLC30A9
SLC35A4
SLC35B1
SLC35C1
SLC38A11
SLC38A8
SLC39A9
SLC44A4
SLC44A5
SLC45A4
SLC46A2
SLC46A3
SLC47A2
SLC48A1
SLC4A3
SLC4A8
SLC5A5
SLC6A1
SLC6A6
SLC7A11
SLC7A2
SLC7A8
SLC9A8
SLPI
SMAD9
SMARCA1
SMPD3
SMPDL3B
SNAP25
SNCAIP
SNED1
SNHG8
SNORD116-4
SNRNP48
SNX22
SOCS7
SORBS2
SORD
SORL1
SOX11
SPAG7
SPATA20
SPCS2
SPDEF
SPHK2
SPIN3
SPINK1
SPINK4
SPIRE1
SPIRE2
SPP2
SPRN
SPRY4
SRMS
SRXN1
SSR4
SST
SSTR5
SSX1
ST3GAL3
ST6GALNAC1
ST6GALNAC4
ST7
STAC2
STARD10
STAT3
STAU2
STIM2
STK33
STRBP
SUCLG2
SULT1A3
SUV420H1
SYBU
SYCP2L
SYNE2
SYT13
SYT4
SYT7
TACC2
TAF1L
TALDO1
TARBP1
TARP
TAT
TBC1D19
TBC1D2
TBC1D8
TBL1X
TBX10
TBX15
TBXAS1
TC2N
TCF25
TCF7L1
TCIRG1
TCN1
TCTA
TCTN3
TDGF1
TENC1
TERT
TESC
TET2
TF
TFAP2B
TFCP2L1
TFF1
TFF3
THEM4
THEM5
THSD7A
THTPA
TIRAP
TM4SF5
TM9SF1
TMBIM4
TMED10
TMED3
TMED6
TMEM108
TMEM150C
TMEM17
TMEM176A
TMEM176B
TMEM178
TMEM181
TMEM200C
TMEM205
TMEM229A
TMEM35
TMEM41B
TMEM59L
TMEM66
TMEM80
TMEM9
TMTC1
TMTC4
TMX4
TNFRSF10C
TNFSF11
TNFSF15
TNRC6C
TOB1
TPD52L1
TRABD
TRAF2
TRAF3IP1
TRAPPC9
TREML3
TRIM16L
TRIM17
TRIM31
TRIM37
TRIM46
TRIM53
TRIM68
TRIM71
TRIM72
TRIT1
TRMU
TRPM3
TRPM5
TRPM6
TRPV1
TSC22D1
TSNARE1
TSNAX
TSPAN1
TSPAN11
TSPAN7
TSPAN8
TSPYL2
TSTA3
TTC12
TTC13
TTC38
TTC39A
TTC39C
TTC8
TTLL6
TUBB1
TUBGCP6
TXNDC11
TXNDC2
TXNL4A
TXNRD2
TYRP1
UBE2Q2P1
UBXN2B
UBXN8
UCHL1
UFC1
UGDH
UGGT1
UGT1A3
UGT1A6
UGT2B28
UGT2B4
UGT3A1
UGT3A2
UNC13B
UOX
UPF0639
UPF3A
URB1
VAMP2
VANGL2
VAPA
VAX2
VMO1
VNN1
VNN2
VNN3
VPS13A
VPS24
VPS36
VPS37A
VSIG2
WASH2P
WASH3P
WDFY4
WDR55
WDR72
WFIKKN1
WFIKKN2
WHAMML1
WHAMML2
WIF1
WNT1
WNT4
WSB1
WWOX
XBP1
XG
XPO7
YIPF6
ZBED1
ZBED3
ZBTB16
ZBTB42
ZBTB7B
ZC3H11A
ZC3H7A
ZCCHC2
ZDHHC16
ZDHHC2
ZFAND5
ZFAT
ZFP42
ZFYVE9
ZKSCAN3
ZMYM2
ZMYND11
ZNF236
ZNF238
ZNF252
ZNF276
ZNF281
ZNF330
ZNF335
ZNF33A
ZNF33B
ZNF395
ZNF397
ZNF444
ZNF516
ZNF517
ZNF618
ZNF692
ZNF710
ZNF76
ZSCAN2
ZSCAN29
ZXDB
