# Supplementary material for: Suppression of STING Associated with LKB1 Loss in KRAS-Driven Lung Cancer
Source: Oxford University Press journal article supplement (doi:10.1158/2159-8290.cd-18-0689), 2018-10-08
Supplement: 203734_2_supp_5064040_pfsn6y.xlsx [file 203734_2_supp_5064040_pfsn6y.xlsx]

## Sheet: Sup. Table4
For qRT-PCR
	Forward (5'-3')	Reverse (5'-3')
human STING	CCAGAGCACACTCTCCGGTA	CGCATTTGGGAGGGAGTAGTA
human DNMT1	AGGCGGCTCAAAGATTTGGAA	GCAGAAATTCGTGCAAGAGATTC
human EZH2	AATCAGAGTACATGCGACTGAGA	GCTGTATCCTTCGCTGTTTCC
human KDM5A	AGCCGAGTTGGGAGGAGTT	TGGACTCTTGGAGTGAAACGA
human KDM5B	CCATAGCCGAGCAGACTGG	GGATACGTGGCGTAAAATGAAGT
human GLP	GCTGTGTGAAAACCGAGCTG	TCCGCTATCCGAGTTAGTGTG
human G9a	GGGCGGGAAAATCACCTCC	CACTCATGCGGAAATGCTGTAT
human CXCL10	GTGGCATTCAAGGAGTACCTC	TGATGGCCTTCGATTCTGGATT
human CCL5	CCAGCAGTCGTCTTTGTCAC	CTCTGGGTTGGCACACACTT
human 36B4	CAGATTGGCTACCCAACTGTT	GGAAGGTGTAATCCGTCTCCA
For qPCR
	Forward (5'-3')	Reverse (5'-3')
human ND1	AACATACCCATGGCCAACCT	AGCGAAGGGTTGTAGTAGCCC
human b-globin	GAAGAGCCAAGGACAGGTAC	CAACTTCATCCACGTTCACC
human chromosome 3	TCAAGTGCCACATCCTATGC	ATTTTTCTAGCCAGGCACCA
human chromosome 10	ACCTGGAAATGGCTGAAATG	AAGTCCTCGCAGAGGTTTCA
human chromosome 13	CGCCAGTGTGTGTAGCACTT	TCGGCCTCTCTCAGTTCTGT
For sgRNA vector
	Target sequence (5'-3')
scramble sgRNA	ATCGTTTCCGCTTAACGGCG
human LKB1 sgRNA1	GTACTCCATCACCATATACG
human LKB1 sgRNA2	CTTCAAGGTGGACATCTGGT
human STING sgRNA	GGTACCGGGGCAGCTACTGG
human POLG sgRNA	GAGACAGTGCTTCCTGTACA
For Mycoplasma detection
	Forward (5'-3')	Reverse (5'-3')
	ACACCATGGGAGCTGGTAAT	CTTCWATCGACTTYCAGACCCAAGGC
For ChIP-qPCR
	Forward (5'-3')	Reverse (5'-3')
human STING promoter	ACCAGTAAAGCTGCGGTTTG	CTGCTCTGGATGATGACGAG
