# Supplementary material for: Suppression of STING Associated with LKB1 Loss in KRAS-Driven Lung Cancer
Source: Oxford University Press journal article supplement (doi:10.1158/2159-8290.cd-18-0689), 2018-10-08
Supplement: 203734_2_supp_5064041_pfsn6y.xlsx [file 203734_2_supp_5064041_pfsn6y.xlsx]

## Sheet: Table1
TCGA sample ID	KRAS	STK11/LKB1	p53
TCGA-55-7726	Mut		Mut
TCGA-95-7567	Mut		Mut
TCGA-55-7576	Mut		Mut
TCGA-50-5941	Mut		Mut
TCGA-44-6777	Mut		Mut
TCGA-99-7458	Mut		Mut
TCGA-97-7554	Mut		Mut
TCGA-55-7911	Mut		Mut
TCGA-78-7145	Mut		Mut
TCGA-05-4405	Mut		Mut
TCGA-55-7907	Mut		Mut
TCGA-05-4430	Mut		Mut
TCGA-95-7039	Mut		Mut
TCGA-50-5933	Mut		Mut
TCGA-69-7980	Mut		Mut
TCGA-49-4505	Mut		Mut
TCGA-64-1677	Mut		Mut
TCGA-64-5775	Mut		Mut
TCGA-97-7938	Mut		Mut
TCGA-55-7283	Mut		Mut
TCGA-64-5778	Mut		Mut
TCGA-78-7148	Mut	Mut
TCGA-73-7498	Mut	Mut
TCGA-44-6776	Mut	Mut
TCGA-78-7161	Mut	Mut
TCGA-05-4417	Mut	Mut
TCGA-53-7813	Mut	Mut
TCGA-91-6849	Mut	Mut
TCGA-86-7713	Mut	Mut
TCGA-80-5608	Mut	Mut
TCGA-50-5932	Mut	Mut
TCGA-35-3615	Mut	Mut
TCGA-64-5774	Mut	Mut
TCGA-78-7167	Mut	Mut
TCGA-50-7109	Mut	Mut
TCGA-44-7671	Mut	Mut
TCGA-55-6983	Mut	Mut
TCGA-55-6970	Mut	Mut
